# Supplementary material
Source: PubMed Central journal article supplement (PMC1482542)
Supplement: pnas_0601687103_1.pdf [file pnas_0601687103_1.pdf]

**Table 8.** CDC Reaction of Tetrahydroisoquinoline with 2-Naphthol Derivatives<sup>a</sup>

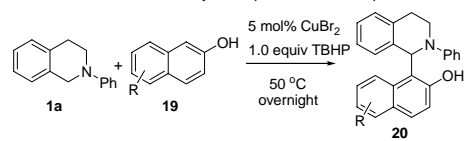

| entry | 19 | product 20 | yield <sup>b</sup> |
|-------|----|------------|--------------------|
| 1     |    |            | 72 (53)            |
| 2     |    |            | 74 (63)            |
| 3     |    |            | 61 (49)            |
| 4     |    |            | 69 (55)            |

<sup>a</sup>Tetrahydroisoquinoline (0.2 mmol), 2-naphthol derivatives (0.1 mmol), TBHP (0.2 mmol, 5.5 M in decane), and CuBr<sub>2</sub> (5 mol%). <sup>b</sup> NMR yields are based on 2-naphthol derivatives and determined by <sup>1</sup>H NMR using an internal standard; isolated yields are given in parentheses.
